# Supplementary material
Source: publisher figshare collection journal article supplement (https://tandf.figshare.com/ndownloader/files/21874860)
Supplement: Supplementary file 1 [file 21874860]

MATLAB Code for manuscript:

**Is it possible to detect a true Rotation Axis of the Temporomandibular Joint with common Pantographic Methods? A fundamental kinematic Analysis.**

Tested for MATLAB Version R2018a

(hint: please be careful with line feeds pasting this document into MATLAB)

%Pantographic Method Simulation (Near TMJ Trace Tracking Method)

%Fundamental Kinematic Measurement Simulation

% Author: Albert Mehl

% Corresponding Paper: Is it possible to detect a true Rotation Axis of the Temporomandibular Joint

% with common Pantographic Methods? A fundamental kinematic Analysis.

% in: Computer Methods in Biomechanics and Biomedical Engineering, Feb 2020

% July 2018; Last revision: 01-2020

%Values for Model:

% Radius(in mm):

r = 90.7;

% Length of Arc (Opening) (in mm):

b = -15;

% Center of Circle (Rotation):

center = [0; 0];

% angle in rad:

alpha = b/r;

% angle in degree:

fprintf('Angle: %i deg\n', rad2deg(alpha));

%create schematic jaw object

r_object = 8; % in mm

centerobject = [0;0];

steps_t1 = linspace(0, pi, 30);

part1_object = [centerobject(1) + r_object *cos(steps_t1); centerobject(2) + r_object *sin(steps_t1)];

part2_object = [linspace(centerobject(1)-r_object,centerobject(1)-r_object,30); linspace(centerobject(2),centerobject(2)-53,30)];

part3_object = [linspace(centerobject(1)-r_object,centerobject(1)+85,30); linspace(centerobject(2)-53,centerobject(2)-53,30)];

part4_object = [linspace(centerobject(1)+85,centerobject(1)+85,30); linspace(centerobject(2)-53,centerobject(2)-35,30)];

part5_object = [linspace(centerobject(1)+85,centerobject(1)+r_object,30); linspace(centerobject(2)-35,centerobject(2)-35,30)];

part6_object = [linspace(centerobject(1)+r_object,centerobject(1)+r_object,30); linspace(centerobject(2)-35,centerobject(2),30)];

object_total = horzcat(part1_object, part2_object, part3_object, part4_object, part5_object, part6_object);

point_ref1 =[centerobject(1); centerobject(2) + r_object];

point_ref2 = [centerobject(1)+85;centerobject(2)-35];

point_ref3 = [centerobject(1)+85;centerobject(2)-53];

point_ref4 = [centerobject(1)+50;centerobject(2)-35];

point_ref5 = [centerobject(1)+50;centerobject(2)-53];

object_reference_points = horzcat(centerobject, point_ref1, point_ref2, point_ref3, point_ref4, point_ref5);

%simulate movements steps with rotation and translation

n_steps_alpha = 20; %number of incremental steps of rotation angle alpha

for i_shift = 0:3

SArcLength = 0; %reset arc length

%uniform movement

alpha_step = linspace(0, alpha, n_steps_alpha); %time interval function for alpha

t_steps = [linspace(0,i_shift,n_steps_alpha); linspace(0,-i_shift/2,n_steps_alpha)]; %corresponding

%translation to each rotation increment

%necessary for iterative movement simulation

p_end_rot = object_reference_points; %start with initial orientation

p_object_end_rot = object_total;

%set position of marker measurement reference coordinate system (external

%coordinate system) => origin is position of origin of fixed mandible

%coordinate system in external coordinate system

origin = [0;0];

%transfer internal coordinates to external coordinates for plotting

object_reference_points_origin = object_reference_points + origin;

object_total_origin = object_total + origin;

%set figures

fig1 = figure('Name','Mandible in Extern Reference Coordinate System');

%fig2 = figure('Name','Position of ICR');

fig3 = figure('Name','Pathways near global center of rotation: ARC LENGTH');

fig4 = figure('Name','Pathways near global center of rotation: MAX DISTANCE');

figure(fig1);

plot(object_total_origin(1,:),object_total_origin(2,:),'b');

hold on;

plot(object_reference_points_origin(1,:), object_reference_points_origin(2,:), '+r');

axis equal;

hold on;

%Determine first center of the entire movement to get the mid point for the

%visualisation of fig 3 and 4 -> should be equal to the last entire movement at the end of this program

%additional rotation center of entire movement!

p_start_rot0_all = object_reference_points; %start with initial position

p_start_rot0 = p_start_rot0_all(:,3:6);

p_start_markers0 = p_start_rot0 + origin;

R_2dim = [cos(alpha) -sin(alpha); sin(alpha) cos(alpha)];

p_end_rot0 = R_2dim * p_start_rot0;

%in translated coordinate system

p_end_markers0 = p_end_rot0 + origin + t_steps(:,n_steps_alpha);

X0_trans = p_start_markers0;

X0 = transpose(X0_trans);

Y0_trans = p_end_markers0; %take last position from above

Y0 = transpose(Y0_trans);

[error,Xrot,transformation] = procrustes(X0,Y0,'scaling',false,'reflection',false);

I = eye(2);

A = transformation.T - I;

translation_help = [transformation.c(1,1);transformation.c(1,2)];

translation = -(transformation.T*translation_help);

t_vec = A\translation;

CoR_x_global = -t_vec(1); % minus, because new origin + t_vec = 0!!

CoR_y_global = -t_vec(2);

figure(fig3);

plot(CoR_x_global, CoR_y_global,'ks','MarkerSize',12);

hold on;

%Create sample points around Center of Rotation:

n_gridsamples = 7;

rangex = 5;

rangey = 5;

x0_samples = linspace(CoR_x_global - rangex, CoR_x_global + rangex, n_gridsamples);

y0_samples = linspace(CoR_y_global - rangex, CoR_y_global + rangey, n_gridsamples);

TempSample = [linspace(x0_samples(1),x0_samples(1),n_gridsamples); y0_samples];

p_samples = TempSample;

for ixgrid = 2:n_gridsamples

TempSample = [linspace(x0_samples(ixgrid),x0_samples(ixgrid),n_gridsamples); y0_samples];

p_samples = horzcat(p_samples,TempSample);

end

plot(p_samples(1,:), p_samples(2,:),'+');

hold on;

p_samples_end_rot = p_samples - origin;

figure(fig4);

plot(CoR_x_global, CoR_y_global,'ks','MarkerSize',12);

hold on;

plot(p_samples(1,:), p_samples(2,:),'+');

hold on;

for ki0=1:(n_gridsamples*n_gridsamples)

p_samples_all(1,1,ki0) = p_samples(1,ki0);

p_samples_all(1,2,ki0) = p_samples(2,ki0);

end

%start iterative movement with parameter settings from above

%IMPORTANT: rotation center is always set to (0,0) in the intern coordinate

%system!! -> to change rotation center -> shift entire object with respect

%to internal coordinates

for i_alpha = 2:n_steps_alpha

delta_alpha = alpha_step(i_alpha) - alpha_step(i_alpha-1);

R_2dim = [cos(delta_alpha) -sin(delta_alpha); sin(delta_alpha) cos(delta_alpha)];

%delta_t = t_steps(i_alpha) - t_steps(i_alpha-1);

p_start_rot = p_end_rot; %start with rotated orientation of last transformation

p_end_rot = R_2dim * p_start_rot;

p_object_start_rot = p_object_end_rot;

p_object_end_rot = R_2dim * p_object_start_rot;

%in translated coordinate system

p_start = p_start_rot + origin + t_steps(:,i_alpha-1);

p_end = p_end_rot + origin + t_steps(:,i_alpha);

%p_object_start = p_object_start_rot + origin + t_steps(:,i_alpha-1);

p_object_end = p_object_end_rot + origin + t_steps(:,i_alpha);

figure(fig1);

plot(p_object_end(1,:),p_object_end(2,:));

hold on;

plot(p_end(1,:), p_end(2,:), '+r');

axis equal;

hold on;

p_start_markers = p_start(:,3:6);

p_end_markers = p_end(:,3:6);

X_trans = p_start_markers;

X = transpose(X_trans);

Y_trans = p_end_markers;

Y = transpose(Y_trans);

[error,Xrot,transformation] = procrustes(X,Y,'scaling',false,'reflection',false);

I = eye(2);

A = transformation.T - I;

translation_help = [transformation.c(1,1);transformation.c(1,2)];

translation = -(transformation.T*translation_help);

t_vec = A\translation;

CoR_x = -t_vec(1); % minus, because new_origin_vector + t_vec = 0!!

CoR_y = -t_vec(2);

%plot(CoR_x, CoR_y,'o');

hold on;

%figure(fig2);

%plot(CoR_x, CoR_y,'+');

%hold on;

t_vec_all(:,i_alpha-1)=t_vec;

%rotate and plot grid points movement around center of rotation

p_samples_start_rot = p_samples_end_rot;

p_samples_end_rot = R_2dim * p_samples_start_rot;

%in translated coordinate system

p_samples_start = p_samples_start_rot + origin + t_steps(:,i_alpha-1);

p_samples_end = p_samples_end_rot + origin + t_steps(:,i_alpha);

figure(fig3);

plot(p_samples_end(1,:),p_samples_end(2,:),'.');

axis equal;

hold on;

figure(fig4);

plot(p_samples_end(1,:),p_samples_end(2,:),'.');

axis equal;

hold on;

%arc length

deltaSArcLength = ((p_samples_end(1,:) - p_samples_start(1,:)).^2 + (p_samples_end(2,:) - p_samples_start(2,:)).^2).^0.5 ;

SArcLength = SArcLength + deltaSArcLength;

%store sample points

for ki=1:(n_gridsamples*n_gridsamples)

p_samples_all(i_alpha,1,ki) = p_samples_end(1,ki);

p_samples_all(i_alpha,2,ki) = p_samples_end(2,ki);

end

figure(fig1);

plot(p_samples_end(1,:),p_samples_end(2,:),'.');

hold on;

end

%entire arc length will be plotted

figure(fig3);

labels = cellstr( num2str(SArcLength',3));

text(p_samples_end(1,:),p_samples_end(2,:), labels, 'VerticalAlignment','bottom', ...

'HorizontalAlignment','right', 'FontSize',6)

%maximum distance between point ono arc segment will be calcultaed and plotted

for ksample=1:(n_gridsamples*n_gridsamples)

distance_arc = 0; %reset value

for ki = 1:n_steps_alpha-1

for kj = ki:n_steps_alpha

distk= (p_samples_all(ki,1,ksample)-p_samples_all(kj,1,ksample)).^2 + ...

(p_samples_all(ki,2,ksample)-p_samples_all(kj,2,ksample)).^2;

if distk > distance_arc

distance_arc = distk;

end

end

end

DISTMAX_ArcSegement(ksample) = sqrt(distance_arc);

end

%entire arc length will be plotted

figure(fig4);

labels = cellstr( num2str(DISTMAX_ArcSegement',3));

text(p_samples_end(1,:),p_samples_end(2,:), labels, 'VerticalAlignment','bottom', ...

'HorizontalAlignment','right', 'FontSize',6)

%additional rotation center of entire movement!

p_start = object_reference_points_origin; %start with initial poistion

p_start_markers = p_start(:,3:6);

X_trans = p_start_markers;

X = transpose(X_trans);

Y_trans = p_end_markers; %take last position from above

Y = transpose(Y_trans);

[error,Xrot,transformation] = procrustes(X,Y,'scaling',false,'reflection',false);

I = eye(2);

A = transformation.T - I;

translation_help = [transformation.c(1,1);transformation.c(1,2)];

translation = -(transformation.T*translation_help);

t_vec = A\translation;

CoR_x = -t_vec(1); % minus, because new origin + t_vec = 0!!

CoR_y = -t_vec(2);

figure(fig1);

plot(CoR_x, CoR_y,'ks','MarkerSize',12);

hold on;

%figure(fig2);

%plot(CoR_x, CoR_y,'ks','MarkerSize',12);

%hold on;

%collect more information about ICR

dist=0;

for k=1:n_steps_alpha-2

for l=k:n_steps_alpha-1

dist_kl=sqrt((t_vec_all(1,k)-t_vec_all(1,l))^2 + (t_vec_all(2,k)-t_vec_all(2,l))^2);

if dist < dist_kl

dist=dist_kl;

end

end

end

distances_ICR(i_shift+1) = dist;

%rotation center is always set to (0,0) in the intern coordinate

%system-> therefore calculate distance to origin

distance_CoR_origin(i_shift+1) = sqrt((CoR_x - origin(1))^2 + (CoR_y - origin(2))^2);

end
